# Supplementary material for: Human Genome-Wide RNAi Screen Identifies an Essential Role for Inositol Pyrophosphates in Type-I Interferon Response
Source: PLoS Pathog. 2014 Feb 27;10(2):e1003981. doi: 10.1371/journal.ppat.1003981 (PMC3937324; doi:10.1371/journal.ppat.1003981)
Supplement: Table S1 — 226 Regulators of RIG-I mediated IFNβ production identified by RNAi screening. 226 genes that met selection criteria are displayed in alphabetical order. Columns F-H show the results of the “stage determination assays.” Column I displays the conclusion from the “stage determination assays.” Columns K-N show the sequence of the individual siRNA that gave the phenotype. The screen used four separate siRNAs against each gene, but only those siRNAs that yielded a phenotype are shown. Column P shows the Z-score for each gene as averaged from duplicates. Column Q shows the results of meta-analysis in which we investigated whether any of the hit genes had been previously reported to undergo transcriptional upregulation by immune stimuli. In cases where such previous reports were found, the transcription-inducing stimulus is listed. (XLS) [file ppat.1003981.s005.xls]

## Sheet: RIG-I Hits 25-05-13 Ramnik v5
Serial Number	Gene Symbol	Gene ID	Gene Name expanded	Phenotype	Effect on IFNβ induction by ectopic expression of indicated genes			Site of action		Sequences of scored duplexes from the siRNA pool				siRNA Pool Catalogue Number	Primary screen Z-score	Meta analysis results
					MAVS-to-IFNβ	TBK-to-IFNβ	IRF3-5D-to-IFNβ			siRNA-1	siRNA-2	siRNA-3	siRNA-4
1	384D8-2	29781	NCAPH2 non-SMC condensin II complex, subunit H2	Positive Regulator	No effect	No effect	No effect	Upstream of MAVS			GAACAACAAUCCCCUGUAC	CGGAAGGAUUUCAGGAUGA		M-016186-01	-2.66858
2	ADCK2	90956	aarF domain containing kinase 2	Positive Regulator	No effect	No effect	No effect	Upstream of MAVS			GCAGACCAGUCGUUUCUAG	UGUGAAAGCCGUCAAGUUC	UGGCUUAGCUUGCCUGAGA	M-005304-01	-2.8985
3	AEGP	158056	MAM domain containing 4	Positive Regulator	Positive Regulator	Positive Regulator	No effect	Between TBK1 and IRF3			CAACAGACCAUACCACUGA	CCAUGGCGCUGGACGAUGU		M-026036-01	-2.68733
4	ALS2CR2	55437	amyotrophic lateral sclerosis 2 (juvenile) chromosome region, candidate 2	Positive Regulator	No effect	No effect	No effect	Upstream of MAVS		GGAGAAAGUGUGCUUGUCU	CAGGAACACUGGUAACUAU	CAGUGGAACUCACACAGUA		M-005306-02	-3.64405	Induced by Double-stranded RNA
5	ANKRA2	57763	ankyrin repeat, family A (RFXANK-like), 2	Positive Regulator	No effect	No effect	No effect	Upstream of MAVS				GAAAGUGCACUGUCGUUGG	CUACUCGUAUCGAACAAGA	M-016344-01	-3.11065	Induced by Interferon
6	ANKRD9	122416	ankyrin repeat domain 9	Positive Regulator	No effect	No effect	No effect	Upstream of MAVS			CGUUGGACCUCACUGGCAA		GCUACAACCGCGUGGGCAU	M-015551-01	-3.45979
7	AP2A1	160	adaptor-related protein complex 2, alpha 1 subunit	Positive Regulator	Positive Regulator	Positive Regulator	Positive Regulator	Downstream of IRF3		GCAUGUAUCUCUUCUAUGG		UUGGAUGGCUACAGUAAGA		M-012492-00	-4.07032
8	APOA4	337	apolipoprotein A-IV	Positive Regulator	No effect	No effect	No effect	Upstream of MAVS			GGACAAGACUCUCUCCCUC	GAGCAACAAUGCCAAGGAG		M-010995-01	-2.71278
9	APOBEC3A	200315	apolipoprotein B mRNA editing enzyme, catalytic polypeptide-like 3A	Positive Regulator	Positive Regulator	Positive Regulator	Positive Regulator	Downstream of IRF3			CUUGAUGGAUCCACACAUA		UUGGAAGGCAUAAGACCUA	M-017432-00	-3.59053
10	APOM	55937	apolipoprotein M	Positive Regulator	No effect	No effect	No effect	Upstream of MAVS		CCUGUGAGCUGUCCAAUAA		GCUCUGCUCUACUUCUAUG		M-010984-00	-3.29523	Induced by Hepatitis C virus
11	AQP3	360	aquaporin 3 (Gill blood group)	Positive Regulator	No effect	No effect	No effect	Upstream of MAVS		GGAUCAAGCUGCCCAUCUA		GCACUUCGCCGACAACCAG	CCUCUGGACACUUGGAUAU	M-011812-00	-4.74932	Induced by Influenza A H1N1 virus
12	ARHGEF3	50650	Rho guanine nucleotide exchange factor (GEF) 3	Positive Regulator	No effect	No effect	No effect	Upstream of MAVS		CAAACUAGAUCUCUGGAAU	CGAGGGAUCGUUCCUAAAU	GUGAAGGCCACGCCAUUAA		M-013243-00	-3.30525
13	ARID1B	57492	AT rich interactive domain 1B (SWI1-like)	Positive Regulator	Positive Regulator	Positive Regulator	NH	Between TBK1 and IRF3				GGCGAAAGAUUACCUCCAA	GGCGUGAGCUGGCAACCAA	M-013970-00	-4.61793
14	ARL4D	379	ADP-ribosylation factor-like 4D	Positive Regulator	No effect	No effect	No effect	Upstream of MAVS		AAGCCAAGGUGGAGUUGCA			GGCUGGACUCUGCUGGAAA	M-011583-01	-2.54087	Induced by Influenza A H1N1 virus
15	ASAH3	125981	N-acylsphingosine amidohydrolase (alkaline ceramidase) 3	Positive Regulator	Positive Regulator	Positive Regulator	Positive Regulator	Downstream of IRF3			GAGCUUCGGCACCUGAUUG		GGCAGUGGCUAUAGCAUAU	M-010298-00	-4.05954
16	ATP6V0D1	9114	ATPase, H+ transporting, lysosomal 38kDa, V0 subunit d1	Positive Regulator	Positive Regulator	Positive Regulator	NH	Between TBK1 and IRF3		UCCCGGAGCUUUACUUUAA	GCGAGACGCUAGAGGACUU	ACACGCCUCUUGCGGCUUU	GCGCCAAAAUCGACAACUA	M-019238-01	-6.85066
17	B3GAT1	27087	beta-1,3-glucuronyltransferase 1 (glucuronosyltransferase P)	Positive Regulator	No effect	No effect	No effect	Upstream of MAVS		GAAAGCAGCCUCCUUCGAG	GAAGAGAUGCGCAGCACCA			M-012896-01	-3.14781
18	BACH	11332	acyl-CoA thioesterase 7	Positive Regulator	No effect	No effect	No effect	Upstream of MAVS				GCGCACCGACUUCCUGUCU	GACGAGAAGAAGCGCUUUG	M-009532-01	-3.5453
19	BET1L	51272	blocked early in transport 1 homolog (S. cerevisiae)-like	Positive Regulator	No effect	No effect	No effect	Upstream of MAVS		UCAAAUCGCUCGCCCUGGA			UGGCAUGGCCGUGGGUCUA	M-018850-02	-3.89742
20	BMPR2	659	bone morphogenic protein receptor, type II (serine/threonine kinase)	Positive Regulator	No effect	No effect	No effect	Upstream of MAVS			GAAAGGAUGGCUGAACUUA	CAUGUAUGCUCUUGGACUA		M-005309-03	-2.7339
21	C10ORF27	219793	chromosome 10 open reading frame 27	Positive Regulator	Positive Regulator	Positive Regulator	NH	Between TBK1 and IRF3		GCAUGAACCUCCUCAAGAG	GCACGUGACCCACAUCCAA	GCUAAGCGCAAUCCAGUUC	CUGAUUCCCUACCGUGAAA	M-017071-01	-3.62549
22	C17ORF38	146850	phosphoinositide-3-kinase, regulatory subunit 6	Positive Regulator	Positive Regulator	Positive Regulator	Positive Regulator	Downstream of IRF3		GCACCCAACCCAUCUAUUU	GCUCGGAGAUGACAGGAUG	UGGGAGAGCUGGCUACGUU	GGAAACGGGAGACCCAGAA	M-030841-01	-2.99549
23	C1RL	51279	complement component 1, r subcomponent-like	Positive Regulator	No effect	No effect	No effect	Upstream of MAVS		GAACAAGACUGCCCACCUU	GAGAUGGGCUGGCUAACUA			M-007816-00	-3.34935
24	C21ORF62	56245	chromosome 21 open reading frame 62	Positive Regulator	Positive Regulator	Positive Regulator	Positive Regulator	Downstream of IRF3		GCACUUAACUGCUUCACCA	GACUCAGCCUUAAAUCAUA		CAGUAGAGCGAACCAGCUA	M-021062-01	-4.32218
25	C22ORF5	25829	transmembrane protein 184B	Positive Regulator	Positive Regulator	Positive Regulator	No effect	Between TBK1 and IRF3		GAGUCCAGCUGUAUGUAUG		ACAAGAGGCUGGACGCACA		M-016076-01	-2.96401	Induced by H1N1 influenza virus, viral RNA and interferon-beta
26	C6ORF213	134829	clavesin 2	Positive Regulator	No effect	No effect	No effect	Upstream of MAVS			GUAACAACCUGAACAGUCU	GAUUGAAGAUCCUGAGCUU	GUACUAAAACGCAUGGAUA	M-024722-01	-3.03933
27	C6ORF29	80736	solute carrier family 44, member 4	Positive Regulator	No effect	No effect	No effect	Upstream of MAVS			CGUCCUCGCUGGAGCCUUU		AGAACAAAGAUAAGCCGUA	M-014620-01	-3.03747
28	C9ORF12	64768	chromosome 9 open reading frame 12	Positive Regulator	Positive Regulator	Positive Regulator	No effect	Downstream of TBK1		GCAAGAUCGUCAACUAUUA			AGAUGGGCCUUAUGAUGAA	M-006703-03	-3.04323
29	C9ORF4	23732	chromosome 9 open reading frame 4	Positive Regulator	Positive Regulator	Positive Regulator	No effect	Between TBK1 and IRF3		GCAUACAGCACUUCUAUAA		CAGAGCGUGUUGUCAGUAU		M-026185-01	-3.15969
30	C9ORF88	64855	family with sequence similarity 129, member B	Positive Regulator	Positive Regulator	Positive Regulator	Positive Regulator	Downstream of IRF3			GCACGUCCGUGUUCAAGCA		ACAAUGCCGUGUAUACGUU	M-032519-00	-2.70884
31	C9ORF99	84263	hydroxysteroid dehydrogenase like 2	Positive Regulator	No effect	No effect	No effect	Upstream of MAVS		GGAAAGGCCUUGCCAUGUA	GCACCUACCUUGCAUCUAA	GAUUGGAUCUGAUGAUGAA		M-010184-01	-3.33827
32	CACNA1C	775	calcium channel, voltage-dependent, L type, alpha 1C subunit	Positive Regulator	No effect	No effect	No effect	Upstream of MAVS			UCUCUGAGCUUCACCUUAA		GGAAAGCUGUACACCUGUU	M-006123-01	-3.59225
33	CBX8	57332	chromobox homolog 8	Positive Regulator	No effect	No effect	No effect	Upstream of MAVS		GGAAAGGACGCAUGGAAUA		UAACACGGACCAAGGCUUU	GCUCGCAGCCUUUGAGGAA	M-008355-00	-5.0946	Induced by H1N1 influenza virus, viral RNA and interferon-beta
34	CDC42BPA	8476	CDC42 binding protein kinase alpha (DMPK-like)	Positive Regulator	No effect	No effect	No effect	Upstream of MAVS			GCGCAAGACUCACCAGUUU	GAAGAUAGAUUGCCUGAAG		M-003814-04	-3.22596
35	CENTA2	55803	ArfGAP with dual PH domains 2	Positive Regulator	Positive Regulator	Positive Regulator	Positive Regulator	Downstream of IRF3		CCGAGGAAAUCGCUGGAAA			CUUCAAGCACCACGCAGAA	M-020444-02	-4.41925
36	CHST5	23563	carbohydrate (N-acetylglucosamine 6-O) sulfotransferase 5	Positive Regulator	Positive Regulator	Positive Regulator	Positive Regulator	Downstream of IRF3			GCCGAAACCUGUCCGCCUU	GCAAGCCAAUCGAGGCCUU		M-012800-02	-2.93277
37	CLGN	1047	calmegin	Positive Regulator	Positive Regulator	Positive Regulator	No effect	Between TBK1 and IRF3				GAUAAAGUCAGUACGCAAA	CUGGAUGGGUCUUAUCAAA	M-011830-00	-4.21139
38	CRNN	49860	cornulin	Positive Regulator	No effect	No effect	No effect	Upstream of MAVS			GGACAGAGCCCACCAGACA	GAAGAGAAGCGAGGCAUCA		M-010574-02	-2.88331
39	CTSZ	1522	cathepsin Z	Positive Regulator	Positive Regulator	No effect	No effect	Between MAVS and TBK1		CAGAAAGACUGGCUAACUA	GUGACAAGUUUAACCAAUG			M-005846-03	-4.19522
40	CYP4F11	57834	cytochrome P450, family 4, subfamily F, polypeptide 11	Positive Regulator	Positive Regulator	Positive Regulator	No effect	Between TBK1 and IRF3				CAGGAAACCCGAGCUGAUA	CAACAAGAGUGUGAACAUC	M-008902-01	-2.68173
41	DDI1	414301	DNA-damage inducible 1 homolog 1 (S. cerevisiae)	Positive Regulator	No effect	No effect	No effect	Upstream of MAVS			GCGGAAGCCUUGAGACCUU	GCGCCCAGAUGACCAUUAU	GAGUUGCCCUUAUGCUCUA	M-032326-01	-4.18239
42	DDX18	8886	DEAD (Asp-Glu-Ala-Asp) box polypeptide 18	Positive Regulator	No effect	No effect	No effect	Upstream of MAVS		GGGCAUGCCUUGCUCAUUU		GAAGUCGACUGGAUUGUUC		M-013451-00	-3.185
43	DDX24	57062	DEAD (Asp-Glu-Ala-Asp) box polypeptide 24	Positive Regulator	Positive Regulator	Positive Regulator	No effect	Between TBK1 and IRF3		GAGAUGACAUGGUUUGUGA		GAAUCAAAGUUGUGGGAAA		M-010397-01	-2.75451
44	DHDH	27294	dihydrodiol dehydrogenase (dimeric)	Positive Regulator	No effect	No effect	No effect	Upstream of MAVS		CGACCGAGCUGGUGGUGAA	GGGCAGGCAUGAGUUAUGA	GCAGAAGCCAGAGAAGAUU	GCGAAGGAGUUUGCACAGA	M-009651-01	-4.79093
45	DHX38	9785	DEAH (Asp-Glu-Ala-His) box polypeptide 38	Positive Regulator	Positive Regulator	Positive Regulator	No effect	Between TBK1 and IRF3			GAUCGGGAUUGGUACAUGA	AUGCUAAGGCCAUGCGGAA		M-013428-01	-2.77863
46	DKFZP564F0522	25940	family with sequence similarity 98, member A	Positive Regulator	Inconclusive	Inconclusive	Inconclusive	In conclusive		CCAAACAUCUUCUUCAUAU	GCAUGGAGGUUAUCAGUAU			M-022655-01	-2.8278
47	DKFZP586J0619	26173	integrator complex subunit 1	Positive Regulator	Positive Regulator	Positive Regulator	No effect	Between TBK1 and IRF3				GUGAGGUGCUGGACUACUU	GACCCGAGAUCCUGAGCUU	M-025278-01	-2.76031
48	DKFZP586L0724	25926	nucleolar protein 11	Positive Regulator	No effect	No effect	No effect	Upstream of MAVS			UCACGCUGUUUCUUAAGUA	CAAGGAAGGUGCUGUUCGU		M-016695-01	-2.73484
49	DLX3	1747	distal-less homeobox 3	Positive Regulator	No effect	No effect	No effect	Upstream of MAVS				GCAGAGGUGCGCAUGGUGA	CCCUAUGGCCAGACGGUGA	M-025278-01	-5.72932
50	DLX4	1748	distal-less homeobox 4	Positive Regulator	No effect	No effect	No effect	Upstream of MAVS				GCAAGCCGAGGACCAUCUA	GAAAAGGACUGAAUCGCCA	M-011640-01	-4.05485
51	DMRTC1	63947	DMRT-like family C1	Positive Regulator	No effect	No effect	No effect	Upstream of MAVS		CAAAGUCUCUGACCAGGCU	CCAAAGCUCCCAUCCGUGU			M-015059-01	-3.04317
52	DPYSL2	1808	dihydropyrimidinase-like 2	Positive Regulator	Positive Regulator	No effect	No effect	Between MAVS and TBK1		GAAGGGAACUGUGGUGUAU	GAACGGACGGCUCCCAUUA	UCAGAUUGAUGACAACAUU	GGUCAAACCUAAACACCGA	M-009519-01	-2.95963
53	E2IG4	25987	tsukushi small leucine rich proteoglycan homolog	Positive Regulator	No effect	No effect	No effect	Upstream of MAVS		GACGUUGGCUGGCCUGGAU		UGAGCGACGUGAACCUUAG		M-013949-01	-2.73672
54	EPOR	2057	erythropoietin receptor	Positive Regulator	No effect	No effect	No effect	Upstream of MAVS		GCGGUGCGCUUCUGGUGUU	CCUACCAGCUCGAGGAUGA	UGGAGGACUUGGUGUGUUU		M-007895-02	-3.34552
55	ERH	2079	enhancer of rudimentary homolog (Drosophila)	Positive Regulator	Positive Regulator	Positive Regulator	Positive Regulator	Downstream of IRF3		CCAACAGGCUGGGAAAUAA		UCAGUCAGUUGUUUGAUUU		M-012670-01	-3.8495
56	FBXO44	93611	F-box protein 44	Positive Regulator	No effect	No effect	No effect	Upstream of MAVS		GAAGAGCGAUGCCAAGUGG			CAGAUUGCGGGUCCAAGUA	M-019201-01	-3.80853
57	FLJ11323	55344	phosphatidylinositol-specific phospholipase C, X domain containing 1	Positive Regulator	Positive Regulator	Positive Regulator	No effect	Between TBK1 and IRF3		GCGAGGACCUGCACGAGUA	GAAACAGGGUGAAGACCGA	UCACGGAAAUCUCGGAGUG	UCACGGAGAACCUGCAGUA	M-020472-01	-6.43364
58	FLJ14768	84922	FLT3-interacting zinc finger 1	Positive Regulator	No effect	No effect	No effect	Upstream of MAVS			CGGAAGACACCCUGUACCA	AGUGCUACCUCAAGCGCCA		M-015014-01	-2.64733
59	FLJ20273	54502	RNA binding motif protein 47	Positive Regulator	Positive Regulator	Positive Regulator	Positive Regulator	Downstream of IRF3			CAACAGGGACUACUUUGUG	CCCAAUAACUCCAGUAUAC		M-020512-01	-3.61564
60	FLJ25351	151254	amyotrophic lateral sclerosis 2 (juvenile) chromosome region, candidate 11	Positive Regulator	Positive Regulator	Positive Regulator	No effect	Between TBK1 and IRF3		GAGAAGAACACUGUAAUUA	GGAUAGAUAAAGCUAACUA		CGGAUAUCAUGCACAUUAA	M-018770-01	-2.95313
61	FLJ25369	200523	chromosome 2 open reading frame 51	Positive Regulator	Positive Regulator	Positive Regulator	No effect	Between TBK1 and IRF3		GCACCUGCCAUUUCACAUA	AGGCAAAGCUCGAUGCUCA	GCUCCCACAUGGUCGACUA	CCCUGUGGAUUUAGACAUA	M-020472-01	-4.20289
62	FLJ32880	254187	testis specific, 10 interacting protein	Positive Regulator	Positive Regulator	Positive Regulator	Positive Regulator	Downstream of IRF3		CCGAUAUGCUAAAUACCUA	GAACGGGGCUGCUCAAGCU	CGGGAUACGAUGAAACUUU		M-017084-01	-2.68555
63	FLJ35782	170062	family with sequence similarity 47, member B	Positive Regulator	Positive Regulator	No effect	No effect	Between MAVS and TBK1		GCACAGCGUGGGAGGAUAA	GUACAAAGAAGACGUCACA		GUAGACACACAUCGAGAAA	M-016939-00	-4.28315
64	FLJ39531	400360	chromosome 15 open reading frame 54	Positive Regulator	No effect	No effect	No effect	Upstream of MAVS		CAACAGAUGUCCCUUUCAA	CCAACUAUAUGGAGAAGUC			M-032128-01	-3.34229
65	FXYD4	53828	FXYD domain containing ion transport regulator 4	Negative Regulator	No effect	No effect	No effect	Upstream of MAVS		UAAAGACGAUCCCUUCUAC		ACUCAUCACUCCAGGCUCU		M-017419-01	11.3257
66	GEMIN7	79760	gem (nuclear organelle) associated protein 7	Positive Regulator	No effect	No effect	No effect	Upstream of MAVS			CCAUAGGUGUGCAAGCAGA		GGAGCUGGGCCAAGUACGA	M-014419-01	-3.34415	Induced by Hepatitis C virus
67	GJB3	2707	gap junction protein, beta 3, 31kDa	Positive Regulator	No effect	No effect	No effect	Upstream of MAVS			CUUUGAAACAAGCGAAUUA		CAACUUUCGUUUUGGCAGA	M-019948-02	-4.53486
68	GLA	2717	galactosidase, alpha	Positive Regulator	No effect	No effect	No effect	Upstream of MAVS			AGGCAGACCCUCAGCGCUU	GAGUAGAUCUGCUAAAAUU		M-012538-02	-3.65911
69	GP9	2815	glycoprotein IX (platelet)	Positive Regulator	No effect	No effect	No effect	Upstream of MAVS		CAACAGCCUUCAGUCCGUG		UGACUGCAGCCUCACCUAU		M-012540-01	-3.19204
70	GPT	2875	glutamic-pyruvate transaminase (alanine aminotransferase)	Negative Regulator	No effect	No effect	No effect	Upstream of MAVS		GAAGAAGCCUUUCACCGAG	GAACAUGGACGCUGCAGUG		CCGAGCAGGUCUUCAAUGA	M-031622-00	3.15299
71	GSPT1	2935	G1 to S phase transition 1	Positive Regulator	No effect	No effect	No effect	Upstream of MAVS		UGUAGAGACUGAUACCGUA	GGAUUACCGUUUAUUCCAU		CUCAAAGAGCAGUCGGAUU	M-019644-01	-3.67561	Induced by Double-stranded RNA
72	GSTT2	2953	glutathione S-transferase theta 2	Positive Regulator	Positive Regulator	Positive Regulator	No effect	Between TBK1 and IRF3		GGGAAACUGCCGACGCUCA	AGGAGAAGGUGGAACGCAA			M-011181-02	-2.97826
73	GUCY2D	3000	guanylate cyclase 2D, membrane (retina-specific)	Positive Regulator	Positive Regulator	Positive Regulator	Positive Regulator	Downstream of IRF3			GCAGAGAUCGCCAACAUGU	CAUCAUUGGUUCCCACGAU	CGGCUGAAGUCACGGAACU	M-005329-02	-3.38405
74	GYS1	2997	glycogen synthase 1	Positive Regulator	No effect	No effect	No effect	Upstream of MAVS		GGACAAGACCUUAUACUUC	CAACGCAGCGGCAGUCUUU			M-017726-00	-2.55554
75	HCA112	55365	transmembrane protein 176A	Positive Regulator	Positive Regulator	Positive Regulator	No effect	Between TBK1 and IRF3		GAAUGAAGAUUUCCGAUAU	GGAAGUGAGUGGAAUCUAG	GGGAACAGCCGACAGUGAU		M-019157-00	-2.55608
76	HIST2H3A	333932	histone cluster 2, H3a	Positive Regulator	Positive Regulator	Positive Regulator	Positive Regulator	Downstream of IRF3			GUGGAGAGCGGGCUUAAGA	GCCGGAGGUUCCAUCGUAU		M-181834-00	-3.07373
77	HIST3H3	8290	histone cluster 3, H3	Positive Regulator	Positive Regulator	Positive Regulator	No effect	Between TBK1 and IRF3		GUGCGAGUCUUACCUGGUG	GGGUCACCAUCAUGCCUAA	CAAGUCAACGGGUGGCAAG	UAGGAGGGCUAUCUCGCCA	M-011429-01	-2.74621
78	HLA-E	3133	major histocompatibility complex, class I, E	Positive Regulator	Positive Regulator	No effect	No effect	Between MAVS and TBK1		GAGCAAAAGUCAAAUGAUG	GUAGAUGGAACCCUCCUUU		ACACCCAGUUCGUGCGCUU	M-012106-01	-3.84601	Induced by Interferon induced
79	HNRPU	3192	heterogeneous nuclear ribonucleoprotein U (scaffold attachment factor A)	Positive Regulator	No effect	No effect	No effect	Upstream of MAVS		GGAAAGACCUACCAGAACA	GUAGAACUCUCGUAUGCUA	GAACAGAAAGGCGGAGAUA	CGUAUUGGCUGGUCACUAA	M-013501-01	-4.44476	Induced by H1N1 influenza virus, viral RNA and interferon-beta
80	HSPC182	29101	SSU72 RNA polymerase II CTD phosphatase homolog (S. cerevisiae)	Positive Regulator	Positive Regulator	Positive Regulator	Positive Regulator	Downstream of IRF3		GAACAGGGACUCACGUGAA	GAACUGCAAAGACCUGUUU	GCGAAGAGAGAGUGUAUGA		M-020740-00	-2.71446
81	IKBKB	3551	inhibitor of kappa light polypeptide gene enhancer in B-cells, kinase beta	Positive Regulator	No effect	No effect	No effect	Upstream of MAVS		GGAAGUACCUGAACCAGUU			GUGGUGAGCUUAAUGAAUG	M-003503-03	-3.31415
82	IL17R	23765	interleukin 17 receptor A	Positive Regulator	Positive Regulator	Positive Regulator	Positive Regulator	Downstream of IRF3		GAACACCAAUGAACGUUUG	GCACCUACGUAGUCUGCUA			M-007943-02	-2.88102
83	IL8	3576	interleukin 8	Positive Regulator	No effect	No effect	No effect	Upstream of MAVS		GAAGAGGGCUGAGAAUUCA		GGACCACACUGCGCCAACA		M-004756-00	-4.35567	Induced by Hepatitis C virus
84	IRF3	3661	interferon regulatory factor 3	Positive Regulator	Positive Regulator	Positive Regulator	Positive Regulator	Downstream of IRF3		GCAAAGAAGGGUUGCGUUU	AUGCACAGCAGGAGGAUUU	GGGAAGAGUGGGAGUUCGA	CCAAGAGGCUCGUGAUGGU	M-006875-02	-4.70951
85	ITK	3702	IL2-inducible T-cell kinase	Positive Regulator	Positive Regulator	No effect	No effect	Between MAVS and TBK1		GAACAAUCCCUGUAUAAAG	GCAGUUAUCUGGUGGAAAA	ACAGUUUGGUGCCUAAAUA		M-003144-03	-2.86922
86	ITPA	3704	inosine triphosphatase (nucleoside triphosphate pyrophosphatase)	Positive Regulator	Positive Regulator	Positive Regulator	Positive Regulator	Downstream of IRF3		AAAUUGACCUGCCGGAGUA			GAUUCUAGGAGAUAAGUUU	M-013681-00	-3.01454
87	KCNQ3	3786	potassium voltage-gated channel, KQT-like subfamily, member 3	Positive Regulator	Positive Regulator	Positive Regulator	Positive Regulator	Downstream of IRF3		CAACAGGUAUUCCGAUUUG	GUACAUCGGUUUCCUGACA		GGACAUCUUUGUGCUGAUU	M-006273-00	-2.63802
88	KIAA0182	23199	KIAA0182	Positive Regulator	Positive Regulator	Positive Regulator	Positive Regulator	Downstream of IRF3		GAAAUGCUCCGUGCCAUGA		CCAAUGAGGAGGAGAAGUG	GGAGAAGCCGGUUGGUGUU	M-022627-00	-3.38826
89	KIAA0252	23168	RNA polymerase II complex component, homolog	Positive Regulator	Positive Regulator	Positive Regulator	Positive Regulator	Downstream of IRF3		GAUUACGGGUGUUGUGGAA	GUUCGAUUAUCACGGCAUA		CCACGAGAGACUAAUCUAA	M-014104-01	-3.88719
90	KIAA0433	23262	diphosphoinositol pentakisphosphate kinase 2	Positive Regulator	Positive Regulator	Positive Regulator	No effect	Downstream of TBK1		GAAGUAAGAUACCCUGUUA			UGGAAUAAAUCGUAAGGUU	M-004785-01	-3.30783	Induced by Interferon induced
91	KIAA1271	57506	mitochondrial antiviral signaling protein	Positive Regulator	Positive Regulator	Positive Regulator	No effect	Between TBK1 and IRF3		AAGUAUAUCUGCCGCAAUU		CAAGAGACCAGGAUCGACU		M-024237-02	-4.24247
92	KIF17	57576	kinesin family member 17	Positive Regulator	Positive Regulator	Positive Regulator	Positive Regulator	Downstream of IRF3		GGAAGAGCCUCACACAUCA	GCAACUACUUCCGAUCUAA			M-022067-01	-3.82913
93	KLK6	5653	kallikrein-related peptidase 6	Positive Regulator	Positive Regulator	Positive Regulator	Positive Regulator	Downstream of IRF3		GCCAAACUCUCUGAACUCA	UGACAUACAUGGAAUAGCA	ACAUCUACCUCCCGACCUA	GAUAAGGAUGAUACAGUCU	M-005917-01	-3.2498
94	KRTAP13-2	337959	keratin associated protein 13-2	Positive Regulator	No effect	No effect	No effect	Upstream of MAVS			GGUGUCAGAUCCCUGGGUU		CAAGACGACUUACUCUGGG	M-031262-01	-4.19414
95	KSP37	83888	fibroblast growth factor binding protein 2	Positive Regulator	No effect	No effect	No effect	Upstream of MAVS				AAGAAGGCCUGGGAACAUU	GCAACACAGACCAGACCUA	M-018587-00	-3.03449
96	LCE3C	353144	late cornified envelope 3C	Positive Regulator	Positive Regulator	Positive Regulator	Positive Regulator	Downstream of IRF3			GCACUUCAGGUCCCAUCAA	CCAGUUGUCCCUCACCCAA		M-019029-00	-3.05752
97	LGP2	79132	DEXH (Asp-Glu-X-His) box polypeptide 58	Positive Regulator	No effect	No effect	No effect	Upstream of MAVS				GCCAGUACCUAGAACUUAA	AGAAUGAGCUGGCCCACUU	M-010582-01	-2.59797	Induced by Interferon; Influenza A H1N1 virus; Double-stranded RNA
98	LLGL2	3993	lethal giant larvae homolog 2	Positive Regulator	No effect	No effect	No effect	Upstream of MAVS			CGAGAGUGGCAACGUGUUU		CGGGACCUGUUCCAGUUUA	M-019812-01	-3.08315
99	LOC139793	139793	P antigen family, member 3 (prostate associated)	Positive Regulator	No effect	No effect	No effect	Upstream of MAVS		AGACUCUAAUCAUCCAGUA		CCAGUAAUGACCAGCUUCA	CCUAAUGUCAAGGGAGAAU	M-024683-02	-2.89067
100	LOC149297	149297	family with sequence similarity 78, member B	Positive Regulator	No effect	No effect	No effect	Upstream of MAVS		GCGAGAACAUCGUGGUGUA		CCACAAAGGAGAAGAUCAU		M-022079-01	-3.04031
101	LOC400673	400673	vimentin-type intermediate filament associated coiled-coil protein	Positive Regulator	No effect	No effect	No effect	Upstream of MAVS		CAGAGGGACGAGCUCAUUA			GUGUUUGGGACCACAGUGU	M-031207-01	-2.77454
102	LOC402682	402682	UFM1-specific peptidase 1 (non-functional)	Positive Regulator	No effect	No effect	No effect	Upstream of MAVS		AGAGGUGAGUGCAGCCUUU	GGUAUUGGACCCUCACUAC		CGUAGGGUCAGGCACGGAA	M-031835-01	-3.43599
103	LOC51136	51136	ring finger protein, transmembrane 1	Negative Regulator	No effect	No effect	No effect	Upstream of MAVS		CAGAUAAACUCCAUACCUA			GCAAGCUCCAGAAAUAUAA	M-010205-01	3.29352
104	LPAL2	80350	lipoprotein, Lp(a)-like 2, pseudogene	Positive Regulator	No effect	No effect	No effect	Upstream of MAVS		GGAAGAACCUGCCAAGCUU	GUACCCAAAUGAUGGCUUG		CGGCAGGCCCUUGGUGUUA	M-012963-00	-3.83375
105	LZTR1	8216	leucine-zipper-like transcription regulator 1	Positive Regulator	No effect	No effect	No effect	Upstream of MAVS				GAAGGACGGUUGCCAGUCG	ACAACCGGCUGCAGGCGUA	M-012318-01	-3.24352
106	MAGEA2B	266740	melanoma antigen family A, 2B	Positive Regulator	No effect	No effect	No effect	Upstream of MAVS			GCCUCCAGCUUCUCGACUA	GAAUGUUUCCCGACCUGGA	CACUAAAGAUCGGUGGAGA	M-019148-00	-2.98547
107	MAML2	84441	mastermind-like 2 (Drosophila)	Positive Regulator	Positive Regulator	No effect	No effect	Between MAVS and TBK1		GUAAUCAACCUAACACAUA	CGAAAGUAAUGGCUAACUA	AGACCAAAUUUAACCCAUA		M-013568-00	-2.59797
108	MESP2	145873	mesoderm posterior 2 homolog (mouse)	Positive Regulator	No effect	No effect	No effect	Upstream of MAVS		GCCCUGAACUUUGGCAAGA	CAACUCAGAGGACCAGGGA			M-022324-01	-3.68954
109	MFNG	4242	MFNG O-fucosylpeptide 3-beta-N-acetylglucosaminyltransferase	Positive Regulator	No effect	No effect	No effect	Upstream of MAVS				GCUAUAUCAUUGAGUGCAA	CCAACUGCUCCGCGGAACA	M-011331-01	-2.88631
110	MGC15407	112942	coiled-coil domain containing 104	Positive Regulator	No effect	No effect	No effect	Upstream of MAVS		GAAAGCAAAUUGACCUAUA	GAAAGGAUAUGAGGACUAA			M-015255-01	-2.7695
111	MGC15882	84970	chromosome 1 open reading frame 94	Positive Regulator	No effect	No effect	No effect	Upstream of MAVS		CAGCGAGGAUGCCCUAUCA		UAACGCACCUGUGACGGUU		M-015033-00	-2.61676
112	MGC16169	93627	TBC1 domain containing kinase	Negative Regulator	No effect	No effect	No effect	Upstream of MAVS		GCUAAAGGCUUAUCCAUAU			GAAGAUGACCAGUCUAAUU	M-005346-00	7.996
113	MGC21394	404203	serine peptidase inhibitor, Kazal type 6	Positive Regulator	Positive Regulator	Positive Regulator	Positive Regulator	Downstream of IRF3			UAACAGGUGUCUUCAGUCA	GCCUAAAGCAUCCUGGAAA		M-031857-01	-2.58441
114	MGC29784	285367	RNA pseudouridylate synthase domain containing 3	Positive Regulator	Positive Regulator	No effect	No effect	Between MAVS and TBK1			CUAGUCGCCUCCAGAAGUA		CCCUGAAACUGGAACACAU	M-018119-01	-3.50559
115	MGC33530	222008	V-set and transmembrane domain containing 2A	Positive Regulator	Positive Regulator	Positive Regulator	Positive Regulator	Downstream of IRF3		CAAGAUCAGCACAGUGAAA	ACAGAGACCCGGACAGCGA	AGAGCAAAUCGCCUGUAAA	CAAUCAGGUGCGAGGAUAG	M-018827-01	-2.80815
116	MGC35097	200942	kelch domain containing 8B	Positive Regulator	Positive Regulator	Positive Regulator	Positive Regulator	Downstream of IRF3		GUGGAGAGCUUUAGCCUUG		CGUCGGGACUGCUGGCUUU	GGAUAAGAGGGCAGACUUU	M-018492-00	-2.8308
117	MGC3731	79159	nucleolar protein 12	Positive Regulator	No effect	No effect	No effect	Upstream of MAVS			GAAACCAACCAAAGCCUUG	CAGCGGAUCUCCUCCCUCA		M-014330-01	-2.60687
118	MGC5601	80724	acyl-CoA dehydrogenase family, member 10	Positive Regulator	No effect	No effect	No effect	Upstream of MAVS			GCAAAGCAGUUCCCAGUGA	GAGCAGGACUGACCAAUGU	AAAGAAGGGUUCCGGGUUU	M-007684-01	-2.79585
119	MIA2	117153	melanoma inhibitory activity 2	Positive Regulator	No effect	No effect	No effect	Upstream of MAVS		GAAAGGAGUUUGGAUAUUU	GGAUACAGGGCUUGAAUUA		GACACAGUCUGAACUAGCA	M-021296-00	-3.32874
120	MORF4L1	10933	mortality factor 4 like 1	Positive Regulator	No effect	No effect	No effect	Upstream of MAVS			UAAAGUACCUGGCAAAGAA	GUACCCAGCUACUCUAUAA	GAUGACUGGGACUUAAUUA	M-006379-00	-3.61305
121	MPST	4357	mercaptopyruvate sulfurtransferase	Positive Regulator	Positive Regulator	Positive Regulator	No effect	Between TBK1 and IRF3		AGAAAGUGGACCUGUCUAA		CCGCCUUCAUCAAGACCUA	GGAGAAGAGCCCUGAGGAG	M-010119-01	-3.40943
122	MTRF1L	54516	mitochondrial translational release factor 1-like	Positive Regulator	No effect	No effect	No effect	Upstream of MAVS		CACCAUGACUGUAGCAAUA			GUUGUUUACAUCAGAGAUA	M-015386-01	-4.32647
123	MYL7	58498	myosin, light chain 7, regulatory	Positive Regulator	Positive Regulator	Positive Regulator	Positive Regulator	Downstream of IRF3		GAGCAGAUGUUCGCCCUGA	GAAGGUGAGUGUCCCAGAG	UCACUGUGCUACAUCAUCA		M-021478-01	-4.2018
124	NEK8	284086	NIMA (never in mitosis gene a)- related kinase 8	Positive Regulator	Positive Regulator	Positive Regulator	Positive Regulator	Downstream of IRF3		GGGCAGAGAGCGAAGUGUA	ACAGGAAGCUCAGCGAGUU	GGUAUCGAUUCCUCCAUGA	UGCCUUCACUGUAGCUAUU	M-004866-00	-3.46843
125	NEU3	10825	sialidase 3 (membrane sialidase)	Positive Regulator	No effect	No effect	No effect	Upstream of MAVS			GAUCUACAGUGAUGACCUA	GUGCAGAGGUCAUGGAAGA		M-010641-01	-2.79317	Induced by Interferon
126	NKIRAS1	28512	NFKB inhibitor interacting Ras-like 1	Positive Regulator	Positive Regulator	Positive Regulator	No effect	Between TBK1 and IRF3		ACAAAGGGAACUCUAAUUC			AGGUAGCAAUUGUGGUAUU	M-021154-01	-3.19408
127	NMB	4828	neuromedin B	Positive Regulator	Positive Regulator	Positive Regulator	NH	Between TBK1 and IRF3			GCAGCCGAGCCAGCAAGAU	GCAGCUGAGUCAUGAUCUG		M-003950-00	-3.16044
128	NNMT	4837	nicotinamide N-methyltransferase	Positive Regulator	No effect	No effect	No effect	Upstream of MAVS		GAAAGAGGCUGGCUACACA		GAAGGGAGACCUGCUGAUU	GCUCCUCUCUGCUUGUGAA	M-010351-01	-2.75146	Induced by Interferon, H1N1 influenza virus, viral RNA and interferon-beta
129	NPHS2	7827	nephrosis 2, idiopathic, steroid-resistant (podocin)	Positive Regulator	No effect	No effect	No effect	Upstream of MAVS		GCGUAAAGGUUGUACAAGA			GAAGAGCAUCGCCCAAGAU	M-021200-00	-3.00985
130	NRD1	4898	RNA-binding protein Nrd1	Positive Regulator	Positive Regulator	Positive Regulator	Positive Regulator	Downstream of IRF3		GAUAAUGCCUCAACUGAUU	GAAACAGAAUACCCAGUUA	GAAAGGAUUUAACCACAAA		M-005980-02	-4.13991
131	NXF1	10482	nuclear RNA export factor 1	Positive Regulator	Positive Regulator	Positive Regulator	Positive Regulator	Downstream of IRF3			GCACACGCGUCUCAACGUU	GGCUAUGUAUUGUAAAUGA	GCGAACGAUUUCCCAAGUU	M-013680-01	-4.51332
132	NXPH3	11248	neurexophilin 3	Positive Regulator	No effect	No effect	No effect	Upstream of MAVS		GGCCACAUCUCACCUAAGU	UCAAGACGGUGGCCCUGAA	GUAAAGCUGUAGAGUUCCA		M-012780-00	-4.66886
133	NXPH4	11247	neurexophilin 4	Positive Regulator	No effect	No effect	No effect	Upstream of MAVS				GUAAAGCUGUAGAGUUCCA	CCAGAUUACAACUACCAUA	M-012780-00	-2.9518
134	OFCC1	266553	orofacial cleft 1 candidate 1	Positive Regulator	No effect	No effect	No effect	Upstream of MAVS			AAACUAAGCAGAAGAAAUC		CAAUAAGAGUCACGAAAUC	M-016633-00	-3.69873
135	P4HA2	8974	prolyl 4-hydroxylase, alpha polypeptide II	Positive Regulator	No effect	No effect	No effect	Upstream of MAVS		GCAAGUGGGUCUCCAAUAA	GCACAUGACUGACCUGAUU			M-006367-01	-2.74652
136	PADI6	353238	peptidyl arginine deiminase, type VI	Positive Regulator	No effect	No effect	No effect	Upstream of MAVS		GGUGGAAGAUGGUACCUUA		AGACAACUCCAGUACCUUU	CCGCCGAUCUCGAUGAGUU	M-032155-01	-5.37338
137	PARP4	143	poly (ADP-ribose) polymerase family, member 4	Positive Regulator	Positive Regulator	Positive Regulator	Positive Regulator	Downstream of IRF3			GAGCAGUUCUGAAGUGAAA	GUGCACACAUAUAAUCUUA	CCACAGACUUUGAGGAUGA	M-007244-03	-4.23082	Induced by H1N1 influenza virus, viral RNA and interferon-beta
138	PCTK1	5127	PCTAIRE protein kinase 1	Positive Regulator	Positive Regulator	Positive Regulator	Positive Regulator	Downstream of IRF3		UGACACUACUUCCAUAUUU	UCACCAAGCUGUUGCAGUU	UAAAGGAGAUUCAGCUACA	CAUGAAACAUCCAUUCUUC	M-004313-02	-2.96234
139	PDGFD	80310	platelet derived growth factor D	Positive Regulator	Positive Regulator	No effect	No effect	Between MAVS and TBK1		GCGCAUCCAUCAAAGCUUU	GGAAUUACUCGGUCAAUAU	CUAUAACUCUCCAUCAGUA		M-008876-01	-2.71616
140	PGDS	27306	hematopoietic prostaglandin D synthase	Positive Regulator	No effect	No effect	Positive Regulator	In conclusive		CAAGCUGACUGGCCUGAAA	ACACAGAUUUGGCUGGAAA	UAAUGCGCCUCAUCUUAUG	UGCCGUCGCUAACUGGAUA	M-013726-01	-3.6233
141	PHLDA3	23612	pleckstrin homology-like domain, family A, member 3	Positive Regulator	No effect	No effect	No effect	Upstream of MAVS		GAAGAUCCCGGCUGGAACG	GCAAAGGGCAGUAACCACA	GAGCUGAAGGAAUGGACGA	GCAUCAAGGCCGUGGAGUG	M-020169-01	-2.69207
142	PI4K2B	55300	phosphatidylinositol 4-kinase type 2 beta	Positive Regulator	Positive Regulator	Positive Regulator	No effect	Downstream of TBK1			GAAGAGUCCUUUCCAGCUA		GUUACAAGGAGGCUGAAUA	M-006769-01	-2.83112
143	PIGM	93183	phosphatidylinositol glycan anchor biosynthesis, class M	Positive Regulator	Positive Regulator	No effect	No effect	Between MAVS and TBK1		GCGAAUGGCUCCUGAACUU			GGUAUACGGACAUCGACUA	M-017388-01	-3.30783
144	PKIG	11142	protein kinase (cAMP-dependent, catalytic) inhibitor gamma	Positive Regulator	Positive Regulator	Positive Regulator	Positive Regulator	Downstream of IRF3		GGAAUGCGGUCCCUGACAU	AGGCUGUGAGCGUGAGGAA	CCAGGAAAUAAAUGCCGAU	AAGAAGGCUGGACGAGAGA	M-017218-02	-3.04713
145	PLA2G1B	5319	phospholipase A2, group IB (pancreas)	Positive Regulator	Positive Regulator	Positive Regulator	Positive Regulator	Downstream of IRF3		GGACAAGUGCUGCCAGACA	GCUCGGCAAUCACCUGUAG		ACAAGAACCUGGACACCAA	M-008873-00	-3.53561
146	PLAA	9373	phospholipase A2-activating protein	Positive Regulator	No effect	No effect	No effect	Upstream of MAVS			GGAAGUAGUACAAGACCUA		ACGCAACCAUUGAUUCUAA	M-016215-01	-3.30783
147	POLR2H	5437	polymerase (RNA) II (DNA directed) polypeptide H	Positive Regulator	No effect	No effect	Positive Regulator	In conclusive		GCAAGAAGUUUGACCGAGU			UAGCUAGUACCUUGUAUGA	M-012247-00	-3.5435
148	POLR3B	55703	polymerase (RNA) III (DNA directed) polypeptide B	Positive Regulator	No effect	No effect	No effect	Upstream of MAVS		GUGCUGGACUUAUCCCAUA	GACCCUAUGUGGUACUUAA			M-016902-01	-3.83906	Induced by Influenza A H1N1 virus, Double-stranded RNA
149	POU2F2	5452	POU class 2 homeobox 2	Positive Regulator	Positive Regulator	Positive Regulator	Positive Regulator	Downstream of IRF3			CCACUCGGCUAUCGGCUUG		CUAGCGAACCAGAAGCCUA	M-019690-01	-2.79856
150	PPIB	5479	peptidylprolyl isomerase B (cyclophilin B)	Positive Regulator	No effect	No effect	No effect	Upstream of MAVS		GAAAGAGCAUCUACGGUGA			GGAAAGACUGUUCCAAAAA	M-004606-00	-5.13646
151	PPP1R10	5514	protein phosphatase 1, regulatory (inhibitor) subunit 10	Positive Regulator	Positive Regulator	Positive Regulator	Positive Regulator	Downstream of IRF3		GCUACAAACUUCUUAACAA	GCAAUAGUCAGGAGCGAUA	GCAGACCCGUUCACCAGAA		M-011358-00	-2.51812
152	PRG1	5552	p53-responsive gene 1	Positive Regulator	No effect	No effect	No effect	Upstream of MAVS		AAUCGUAUCUUCCCACUUU		CGAACUACUUCCAGGUGAA		M-019692-00	-2.79792	Induced by H1N1 influenza virus, viral RNA and interferon-beta
153	PRKCQ	5588	protein kinase C, theta	Positive Regulator	No effect	No effect	No effect	Upstream of MAVS		GCGAGGCUGUUAACCCUUA	GCUCGCUGCUUAAGAGAUA			M-003525-01	-2.90063
154	PRKR	5610	eukaryotic translation initiation factor 2-alpha kinase 2	Negative Regulator	Negative Regulator	Negative Regulator	Negative Regulator	Downstream of IRF3		CAAAUUAGCUGUUGAGAUA	GGAAAGACUUACGUUAUUA		GAUCUUAAGCCAAGUAAUA	M-003527-00	9.56971	Induced by Interferon
155	PROZ	8858	protein Z, vitamin K-dependent plasma glycoprotein	Positive Regulator	No effect	No effect	No effect	Upstream of MAVS		GUUAACAAAUUCCGAAGGA		GGGCUCCUAUCUUCUGGAA		M-010099-00	-4.92722
156	PRPF31	26121	PRP31 pre-mRNA processing factor 31 homolog (S. cerevisiae)	Positive Regulator	No effect	No effect	No effect	Upstream of MAVS		GCUCUUAGCUGAUCUCGAA	GGAAGCAGGCCAACCGUAU	GCGCCUGAAUACCGCGUCA		M-020525-01	-4.03592
157	PRY	9081	PTPN13-like, Y-linked	Positive Regulator	Positive Regulator	Positive Regulator	Positive Regulator	Downstream of IRF3		UGCCAGGGAUGCAAUAUUU	GCACUGAGCCUGCAAACCA	GAAGGUUGGCUGUAUCUCA	ACGUUCAUGAAGAAGACUA	M-019833-01	-2.58284
158	PSMB8	5696	proteasome (prosome, macropain) subunit, beta type, 8 (large multifunctional peptidase 7)	Positive Regulator	No effect	No effect	No effect	Upstream of MAVS				UCAGCUGGGUCCUACAUUA	GGAAGAUGGUUGGGUGAAA	M-006022-01	-3.07414	Induced by Double-stranded RNA, Hepatitis C virus
159	PSORS1C2	170680	psoriasis susceptibility 1 candidate 2	Positive Regulator	Positive Regulator	Positive Regulator	Positive Regulator	Downstream of IRF3			UCAGGAGGAGCCAGACCUA	CAACAUUGCCUCAGGGCCC	CGUAAGGUGGUGUUCUCAA	M-020744-01	-4.0298
160	RAN	5901	RAN, member RAS oncogene family	Positive Regulator	Positive Regulator	Positive Regulator	Positive Regulator	Downstream of IRF3		AGAAGAAUCUUCAGUACUA	GUGAAUUUGAGAAGAAGUA	CCUAUUAAGUUCAAUGUAU	ACAGGAAAGUGAAGGCGAA	M-010353-00	-2.60418
161	RASL11B	65997	RAS-like, family 11, member B	Positive Regulator	Positive Regulator	Positive Regulator	No effect	Between TBK1 and IRF3		GUAAAGAGGUCAGUCACAA	GCGAAGAACCUCCCUCAUU			M-014259-00	-3.60593
162	RBBP6	5930	retinoblastoma binding protein 6	Positive Regulator	Positive Regulator	Positive Regulator	No effect	Between TBK1 and IRF3		CCUCUAAACUCAACUAUGA			GGUGUUAAAUCUACAAGCA	M-006551-00	-5.83159
163	RBM28	55131	RNA binding motif protein 28	Positive Regulator	No effect	No effect	No effect	Upstream of MAVS		CGAGAAGGCUUGAUUCGUG	UAAGGCAUGUCGAGGCUUU		GCGAUAGUAUUGAUGAUGG	M-021145-00	-3.04406
164	RELA	5970	GDP/GTP pyrophosphokinase	Positive Regulator	Positive Regulator	Positive Regulator	Positive Regulator	Downstream of IRF3		GGAUUGAGGAGAAACGUAA	CUCAAGAUCUGCCGAGUGA	GGCUAUAACUCGCCUAGUG	GAUUGAGGAGAAACGUAAA	M-003533-02	-3.58651
165	RNF135	84282	ring finger protein 135	Positive Regulator	No effect	No effect	No effect	Upstream of MAVS		UGACAGAGCUGGUGGAACA	CAUCCAACCUUUAACUUGA	GAGAAGAGCAUCACAGAAG	GGACUCUUGUUGUGUGGAA	M-007087-01		Induced by Double-stranded RNA
166	RNF215	200312	ring finger protein 215	Positive Regulator	Positive Regulator	Positive Regulator	Positive Regulator	Downstream of IRF3		CCUGUAAGCACGAGUUUCA	AAGUUGACCUUGUGGACCA			M-024565-01	-5.27797
167	RP3-402H5.2	442213	chromosome 6 open reading frame 138	Positive Regulator	No effect	No effect	No effect	Upstream of MAVS			CAAUUGAGCUGGGCGUUCU	GGUCUUUGCUGGCCAACUA		M-032649-01	-4.70976
168	RPL6	6128	ribosomal protein L6	Positive Regulator	Positive Regulator	Positive Regulator	Positive Regulator	Downstream of IRF3		CCAGAAAGGCCAUGUACAA	AGGGUAACCUCAAAGCUAA	UCGAGUUCCUCUACGAAGA	CCGCUAAAUCCAAGGUUGA	M-012955-01	-3.79907
169	RPP30	10556	ribonuclease P/MRP 30kDa subunit	Positive Regulator	No effect	No effect	No effect	Upstream of MAVS		GAAGAAACCUCGGCCAUCA			GCGCGGACUUGUGGAGACA	M-015336-01	-4.16681
170	SART1	9092	squamous cell carcinoma antigen recognized by T cells	Positive Regulator	Positive Regulator	Positive Regulator	Positive Regulator	Downstream of IRF3		CCGAAUACCUCACGCCUGA	GCAAGAGCAUGAACGCGAA	GCUACAAACCCGACGUUAA	GAACCGAUCGUGAAUAGGG	M-017283-01	-3.65148
171	SETDB2	83852	SETDB2 SET domain, bifurcated 2	Positive Regulator	No effect	No effect	No effect	Upstream of MAVS			GAAAUUCUCUCUCUUGAAG	CCACCAAAGUUCAGUAAUA		M-014751-00	-3.03411
172	SF3B1	23451	splicing factor 3b, subunit 1, 155kDa	Positive Regulator	Positive Regulator	Positive Regulator	Positive Regulator	Downstream of IRF3		AGGCGGACCAUGAUAAUUU	GGAGUGGGCCUCGAUUCUA	CGAGUUUGCUUGGUCAGAA	GGAUACGUGACAUCAAUUG	M-020061-02	-4.4757
173	SGCZ	137868	sarcoglycan, zeta	Positive Regulator	No effect	No effect	No effect	Upstream of MAVS		CGAAAGAGGUGCUUAUACU	GAACAAUACAUACUAGCAA			M-010970-01	-3.28113
174	SH3GL3	6457	SH3-domain GRB2-like 3	Positive Regulator	Positive Regulator	Positive Regulator	Positive Regulator	Downstream of IRF3		GAACUAAACUAGACGAUGA	GCUAAUGGCUGAGGUGAAA			M-015728-01	-2.69712	Induced by H1N1 influenza virus, viral RNA and interferon-beta
175	SIM2	6493	single-minded homolog 2 (Drosophila)	Positive Regulator	No effect	No effect	No effect	Upstream of MAVS		UCACGGAGAUUGAAUACAA	UGACCGAGGUGACGGGUUA			M-008598-01	-3.3263
176	SLC16A1	6566	solute carrier family 16, member 1 (monocarboxylic acid transporter 1)	Positive Regulator	No effect	No effect	No effect	Upstream of MAVS		GCAGUAUCCUGGUGAAUAA		GGUAAUUGGAGCUUUCAUU		M-007402-02	-3.31476
177	SLC18A1	6570	solute carrier family 18 (vesicular monoamine), member 1	Positive Regulator	No effect	No effect	No effect	Upstream of MAVS		UAUAUGACAUGGAGUUCAA			CAUGAGAGAGGACGAGCCA	M-007419-01	-2.75361
178	SLC1A4	6509	solute carrier family 1 (glutamate/neutral amino acid transporter), member 4	Positive Regulator	No effect	No effect	No effect	Upstream of MAVS			GAACAGCAGCUCUGGAAAU	GGACGGAGCAGCCAUCUUC		M-007428-01	-3.13763
179	SLC29A1	2030	solute carrier family 29 (nucleoside transporters), member 1	Positive Regulator	Positive Regulator	Positive Regulator	Positive Regulator	Downstream of IRF3			GCCAUGAUCUGCGCUAUUG	AGAGGAAUCUGGAGUUUCA		M-003709-01	-4.51261
180	SLC39A13	91252	solute carrier family 39 (zinc transporter), member 13	Positive Regulator	No effect	No effect	No effect	Upstream of MAVS		CCAGCUUCCUUGUGAGCAA	AGAUGUUCCUGGACAGCAA	GCAUCAAAGUCAGCGGCUA		M-007568-00	-2.9718
181	SLITRK6	84189	SLIT and NTRK-like family, member 6	Positive Regulator	No effect	No effect	No effect	Upstream of MAVS		GAAGAAGGAUCGUUUAUGA			GUAACCACCUGACCAAAUU	M-004305-00	-2.58195
182	SMCR7	125170	Smith-Magenis syndrome chromosome region, candidate 7	Positive Regulator	Positive Regulator	No effect	No effect	Between MAVS and TBK1				GAAGCGGCGUAGCGACGAA	AGAAGGGCCUGCAGAAACU	M-017272-00	-3.26992
183	SMPD2	6610	sphingomyelin phosphodiesterase 2, neutral membrane (neutral sphingomyelinase)	Positive Regulator	Positive Regulator	Positive Regulator	Positive Regulator	Downstream of IRF3		GCAGAGAGGUCGCCGUUGA		CAAGGCAGUUUCUGGGUUU	UGAAACCACUACAGGCUUU	M-006677-01	-6.66333
184	SMR3B	10879	submaxillary gland androgen regulated protein 3B	Positive Regulator	Positive Regulator	Positive Regulator	Positive Regulator	Downstream of IRF3		CCAGGGAUAUUUCCACCAC		GCUCUUGCAGCGUGUUUCA		M-020063-02	-4.02263	Induced by Hepatitis C virus
185	SNRPA1	6627	small nuclear ribonucleoprotein polypeptide A'	Positive Regulator	No effect	No effect	No effect	Upstream of MAVS		AAAUCUAGGUGCUACGUUA		UAAGAAAUCCGGUAACCAA	UCAAAUCGCUGACUUACCU	M-019577-01	-3.21376	Induced by Double-stranded RNA
186	SNRPD2	6633	small nuclear ribonucleoprotein D2 polypeptide 16.5kDa	Positive Regulator	No effect	No effect	No effect	Upstream of MAVS		GAUAGGCACUGCAACAUGG	UCAACAAGCCCAAGAGUGA	UCAAGAACAAUACCCAAGU	AUCAACUGCCGCAACAAUA	M-013617-00	-3.53944	Induced by Interferon
187	SNX27	81609	sorting nexin family member 27	Positive Regulator	No effect	No effect	No effect	Upstream of MAVS		GUACGUAAAUUGGCACCUA	GGAACAACGGUUACAGUCA	CCAAGUAUAUCAGGCUAUC	GUGAAUUACUUUGCCUUAU	M-017346-01	-3.42421
188	SOCS2	8835	suppressor of cytokine signaling 2	Positive Regulator	Positive Regulator	Positive Regulator	No effect	Between TBK1 and IRF3		GAAGGAACUUUCUUGAUUA		GCAUUCAGACUACCUACUA		M-017604-00	-3.69685
189	SOCS3	9021	suppressor of cytokine signaling 3	Positive Regulator	No effect	No effect	No effect	Upstream of MAVS				CAGCAUCUCUGUCGGAAGA	GCGAUGGAAUUACCUGGAA	M-004299-02	-5.23654
190	SPANXA1	30014	sperm protein associated with the nucleus, X-linked, family member A1	Positive Regulator	Positive Regulator	No effect	No effect	Between MAVS and TBK1		GCUACAGGAGGAACUUUAA	CCAACGAGGCCAACGAGAU		GGUUGAAAUACCUGCAAAG	M-013560-00	-2.82106	Induced by Double-stranded RNA
191	SPANXE	171489	SPANX family, member E	Positive Regulator	Positive Regulator	Positive Regulator	Positive Regulator	Downstream of IRF3		UGGUUGAAAUACCUGCAAA	GGUUGAAAUACCUGCAAAG			M-017421-01	-3.98282
192	SPATS1	221409	spermatogenesis associated, serine-rich 1	Positive Regulator	No effect	No effect	No effect	Upstream of MAVS		GAAACAGGCCCAAGUGUCA	GCGACAAUCCAUAUAUGUA	CGAUAUUGAUCCCAGGAAU	GGACGGUGGACAAGUGCUU	M-016547-00	-4.39675
193	SPRED3	399473	sprouty-related, EVH1 domain containing 3	Positive Regulator	No effect	No effect	No effect	Upstream of MAVS		UGGUUUACAACAAGGUGAA	AAACAACCUUGGAGUGUAC	GGGUCCGAGCUGUGGUGAU		M-035111-00	-3.98492
194	SSA1	6737	tripartite motif-containing 21	Positive Regulator	No effect	No effect	No effect	Upstream of MAVS			GAGCAUACCUGGAAAUGAA	GGUGAUAAUUGUCCUGGAA		M-006563-02	-3.61875	Induced by Interefron, Influenza A H1N1 virus
195	STAR	6770	steroidogenic acute regulatory protein	Positive Regulator	Positive Regulator	Positive Regulator	Positive Regulator	Downstream of IRF3			AAACUUACGUGGCUACUCA	CCACUUGCAUGGUGCUUCA		M-019369-01	-3.90021
196	STK39	27347	serine threonine kinase 39	Positive Regulator	Positive Regulator	Positive Regulator	Positive Regulator	Downstream of IRF3		GAACAGAGAGUACCUGAUU			AAACAGGGGUAGAGGAUAA	M-004875-02	-2.99645
197	STYK1	55359	serine/threonine/tyrosine kinase 1	Positive Regulator	No effect	No effect	No effect	Upstream of MAVS			GAUUAGGCCUGGCUUAUGA	CCCAGUAGCUGCACACAUA	GGUGGUACCUGAACUGUAU	M-003113-01	STYK1
198	SUOX	6821	sulfite oxidase	Positive Regulator	No effect	No effect	No effect	Upstream of MAVS		GGAGACCUCUGACCCUUAU	GGAGUCAACACACAUAUAC	GUGCAGUGUUGGCCUAUCA	GGAUGAUGGUUACAAUGUG	M-008310-02	-4.56466
199	SYT12	91683	synaptotagmin XII	Positive Regulator	No effect	No effect	No effect	Upstream of MAVS		ACAGGUACCUUCAGCAGAA	GAGAGUGCCUGCCUGGAAU			M-018482-01	-3.96136
200	TAAR9	134860	trace amine associated receptor 9	Negative Regulator	NH	NH	NH	Upstream of MAVS			GUUACAAGAACGUGAACGA		CCUCAGAGAGUUACAAGGA	M-005737-03	4.18534
201	TBX19	9095	T-box 19	Positive Regulator	No effect	No effect	No effect	Upstream of MAVS		GCAGACGGAUGUUUCCAGU	GAAAUCACCUAAGAGACGU	GCGGGCAGAUAAUGUUGAA		M-011910-00	-2.80396
202	TENC1	23371	tensin like C1 domain containing phosphatase (tensin 2)	Positive Regulator	No effect	No effect	No effect	Upstream of MAVS			GAGGAGCAGUUCCCAGUUA	GAAUGUGUGUCACCUCUUU		M-009977-00	-4.95816
203	THAP8	199745	THAP domain containing 8	Positive Regulator	No effect	No effect	No effect	Upstream of MAVS			GCGCCGAACUGCUCCAACA	GGUCUGCAGCGCCUGACAA	GGCCUGACAUAGCCAUGGU	M-021459-01	-3.56127
204	TIE	7075	tyrosine kinase with immunoglobulin-like and EGF-like domains 1	Positive Regulator	No effect	No effect	No effect	Upstream of MAVS		GGGACAGCCUCUACCCUUA	GAAGUUCUGUGCAAAUUGG	CAACAUGGCCUCAGAACUG	UCGAAACUGUGACGAUGAA	M-003179-02	-2.82736
205	TMEM89	440955	transmembrane protein 89	Positive Regulator	No effect	No effect	No effect	Upstream of MAVS		CUGAUGAUCUGCCGCAAGA			CGGCAAAUCCAAAUAAAGG	M-033855-00	-3.14754
206	TNFRSF4	7293	tumor necrosis factor receptor superfamily, member 4	Positive Regulator	Positive Regulator	Positive Regulator	Positive Regulator	Downstream of IRF3			GAAGUGGGAGUGAGCGGAA	GCGACAACCAGGCCUGCAA		M-008100-00	-4.03736
207	TRAPPC1	58485	trafficking protein particle complex 1	Positive Regulator	Positive Regulator	Positive Regulator	Positive Regulator	Downstream of IRF3			CGACUGGACUCCUAUGUUC	CCACAACCUGUACCUGUUU		M-013781-01	-3.75905
208	TRIM63	84676	tripartite motif-containing 63	Positive Regulator	No effect	No effect	No effect	Upstream of MAVS		GGAAGAAGGACACCAGUAA	UCACUCAGCUGGAGGAUUC	GAACAUGGACUUCUUUACU		M-007093-01	-4.70539
209	TRIM64	120146	tripartite motif-containing 64	Positive Regulator	No effect	No effect	No effect	Upstream of MAVS		UCAGUAAGGAAGAGGAUAA		GACAUCGAGAGGAGUGUAA	UGUGGUUAUGAAUGGGAUA	M-026740-03	-3.54017
210	TSPY1	7258	testis specific protein, Y-linked 1	Positive Regulator	No effect	No effect	No effect	Upstream of MAVS				GAAUAUCUGGUGAACAUCA	AUAAAGUGAUUACCAAGGA	M-012606-01	-2.83745
211	TTC17	55761	tetratricopeptide repeat domain 17	Positive Regulator	No effect	No effect	No effect	Upstream of MAVS				GGACCUGGAUCUAUAUGAU	GGACCAGCCUGUACGCUAU	M-015541-01	-2.85957
212	TUBB4Q	56604	tubulin, beta polypeptide 4, member Q	Positive Regulator	Positive Regulator	Positive Regulator	Positive Regulator	Downstream of IRF3			UGAGGGAGGUGGAUGAACA		AGAGCAACAUGAACGACUU	M-010111-02	-3.38488
213	TULP2	7288	tubby like protein 2	Positive Regulator	Positive Regulator	Positive Regulator	Positive Regulator	B/A IRF3		GCACCAAGUUCACCAUCUU	GCACGAAGCCUCCUUGGCA	GCACGGACAGCGACCAUAU		M-011414-01	-4.25047
214	UBE2D3	7323	ubiquitin-conjugating enzyme E2D 3 (UBC4/5 homolog, yeast)	Positive Regulator	No effect	No effect	No effect	Upstream of MAVS		UCAGAAGUAUGCCAUGUGA	AAACAGACAGAGAUAAGUA			M-008478-02	-2.55528
215	UBL5	59286	ubiquitin-like 5	Positive Regulator	Positive Regulator	Positive Regulator	No effect	Between TBK1 and IRF3		GGAAGAAGGUCCGCGUUAA			GGACUAUGAAAUCCACGAU	M-014320-01	-4.42007
216	UBQLN2	29978	ubiquilin 2	Positive Regulator	No effect	No effect	No effect	Upstream of MAVS			UGAAGCACCUGGCCUGAUU		GCUCAACAACCCAGACAUA	M-013566-00	-2.66973	Induced by Hepatitis C virus
217	UCN	7349	urocortin	Positive Regulator	Positive Regulator	No effect	No effect	Between MAVS and TBK1		GAGCAGAACCGCAUCAUAU	CCAUUGACCUCACCUUUCA			M-011418-02	-3.92475
218	UNQ429	130120	regenerating islet-derived 3 gamma	Positive Regulator	No effect	No effect	No effect	Upstream of MAVS		CUUAAACCCUGGCCACUGU		AGAAGGAACUGCCCUCUCC	GGGAGCCUGUCAAGAAGCA	M-027212-01	-3.45952
219	USP2	9099	ubiquitin specific peptidase 2	Positive Regulator	No effect	No effect	No effect	Upstream of MAVS		CCAGCAAGCUCACAACAUU		GCCGACAGAUGUGGAGAAA	GGUUACUGUUCUACGGUCU	M-006069-03	-4.36646
220	UXT	8409	ubiquitously-expressed transcript	Positive Regulator	Positive Regulator	Positive Regulator	Positive Regulator	Downstream of IRF3		UACAAGGCCUGCAGAAUUU	GCAACAGCCUCACCAAGGA			M-004455-00	-2.90209	Induced by Interferon
221	WAC	51322	WW domain containing adaptor with coiled-coil	Positive Regulator	No effect	No effect	No effect	Upstream of MAVS				GAGACAAACCCGUAUCACA	CGAUCCACGUGUUCAUUAA	M-013325-00	-3.44738
222	WBP1	23559	WW domain binding protein 1	Positive Regulator	No effect	No effect	No effect	Upstream of MAVS			GUAUUGAGCUCUGCCCUUG		GAGUGAACAACCAGCCCUA	M-012487-00	-2.87767
223	XAB1	11321	GPN-loop GTPase 1	Positive Regulator	Positive Regulator	Positive Regulator	Positive Regulator	Downstream of IRF3		GGAGUAUCGUCCUGAAUAU	GAGACUACAUACGUCAGUA	GUAUUCACCUGGUCAGCUU	GAUGAACUCUUUGUGCAAG	M-021485-01	-3.66068
224	XPO1	7514	exportin 1 (CRM1 homolog, yeast)	Positive Regulator	Positive Regulator	Positive Regulator	Positive Regulator	Downstream of IRF3		GAAAGUCUCUGUCAAAAUA	GCAAUAGGCUCCAUUAGUG			M-003030-02	-2.81999
225	XTP7	90332	exocyst complex component 3-like 2	Positive Regulator	No effect	No effect	No effect	Upstream of MAVS		GAAUGCAGGACGAGCCUUA	CCAUUUGGCUGAAGUCAUG	GAAUGCGUCACAGAUGUUA		M-017806-00	-3.06368
226	ZMYND11	10771	zinc finger, MYND domain containing 11	Positive Regulator	Positive Regulator	No effect	No effect	Between MAVS and TBK1		GAUCUUCAAUGACUUCAAA		GGAGAGGGCUAUAGAUCUU		M-006936-00	-5.41966
227	ZNF497	162968	zinc finger protein 497	Positive Regulator	No effect	No effect	No effect	Upstream of MAVS				CGGCCAGGCUUUCGUCAUG	GCGCGCAAUCGCAGCUCAU	M-027216-00	-3.36555
228	ZNF529	57711	zinc finger protein 529	Positive Regulator	No effect	No effect	No effect	Upstream of MAVS			AGACUUACGUCAGCCCUUA	GGAUAGAUAACUCCAGUAU	UCGGAGAACUCAUGACAGU	M-014190-01	-3.4025
229	ZNF592	9640	zinc finger protein 592	Negative Regulator	Negative Regulator	Negative Regulator	No effect	Between TBK1 and IRF3		CCUCAAACCUCCAGGCAUA			GAGCGUCCACAUUGAGGUA	M-020790-01	4.31305	Induced by H1N1 influenza virus, viral RNA and interferon-beta
230	ZNF593	51042	zinc finger protein 593	Positive Regulator	Positive Regulator	Positive Regulator	NH	Between TBK1 and IRF3				GCGUCGAGCCCUACAGUCA	CGGACUUGGAUGAGAUUCA	M-017089-01	-3.27615
231	ZNF71	58491	zinc finger protein 71	Positive Regulator	No effect	No effect	No effect	Upstream of MAVS				GUCAUGAACUGAAGGCAUU	CCGAAGCUCGUCCCUGAUA	M-017123-00	-3.48723
232	ZSCAN1	284312	zinc finger and SCAN domain containing 1	Positive Regulator	No effect	No effect	No effect	Upstream of MAVS		GAAGACCCAUCGCGAGGAA			GUGAGUGGCUGGAGACUAC	M-018581-01	-3.3519
